# Supplementary material for: Influence of CuO morphology on the enhanced catalytic degradation of methylene blue and methyl orange
Source: Royal Society of Chemistry journal article supplement (doi:10.1039/c6ra20173c), 2016-01-01

**Electronic Supplementary Information**

**Influence of CuO morphology on enhanced catalytic degradation  
of methylene blue and methyl orange**

**Pangkita Deka,<sup>a</sup> Anil Hazarika,<sup>b</sup> Ramesh C. Deka,<sup>a</sup> Pankaj Bharali<sup>a\*</sup>**

*<sup>a</sup> Department of Chemical Sciences, Tezpur University, Napaam 784 028, India*

*<sup>b</sup> Sophisticated Analytical Instrumentation Centre (SAIC), Tezpur University, Napaam 784 028, India*

**Submitted to RSC Advances**

**Figure S1:** TGA-patterns of the as synthesized  $\text{Cu}_2(\text{OH})_3\text{Cl}$  precursors.

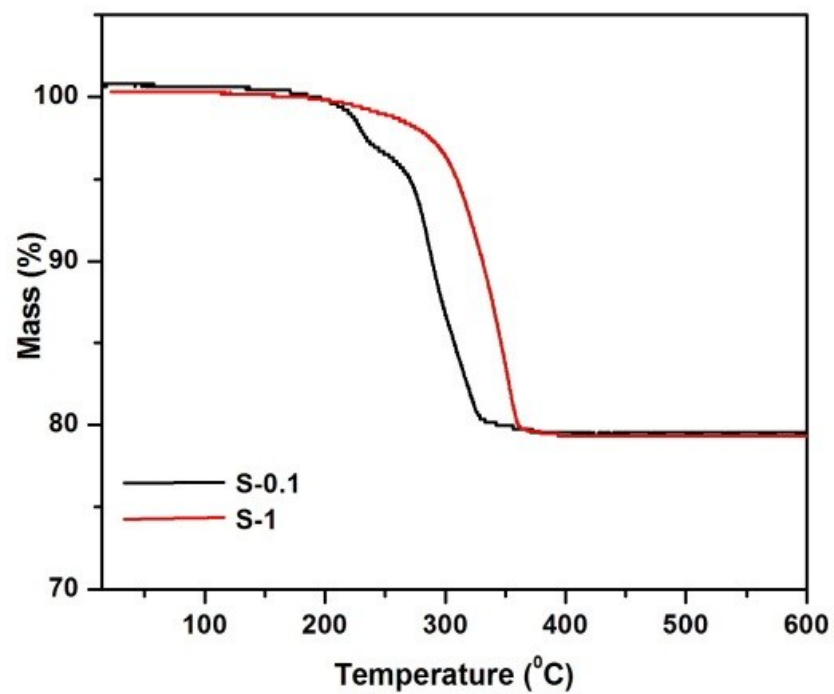

**Figure S2:** Electron image (a) and corresponding EDS elemental maps of Cu, O, and (Cu+O) (b-d), respectively of the as synthesized CuO sample S-0.1.

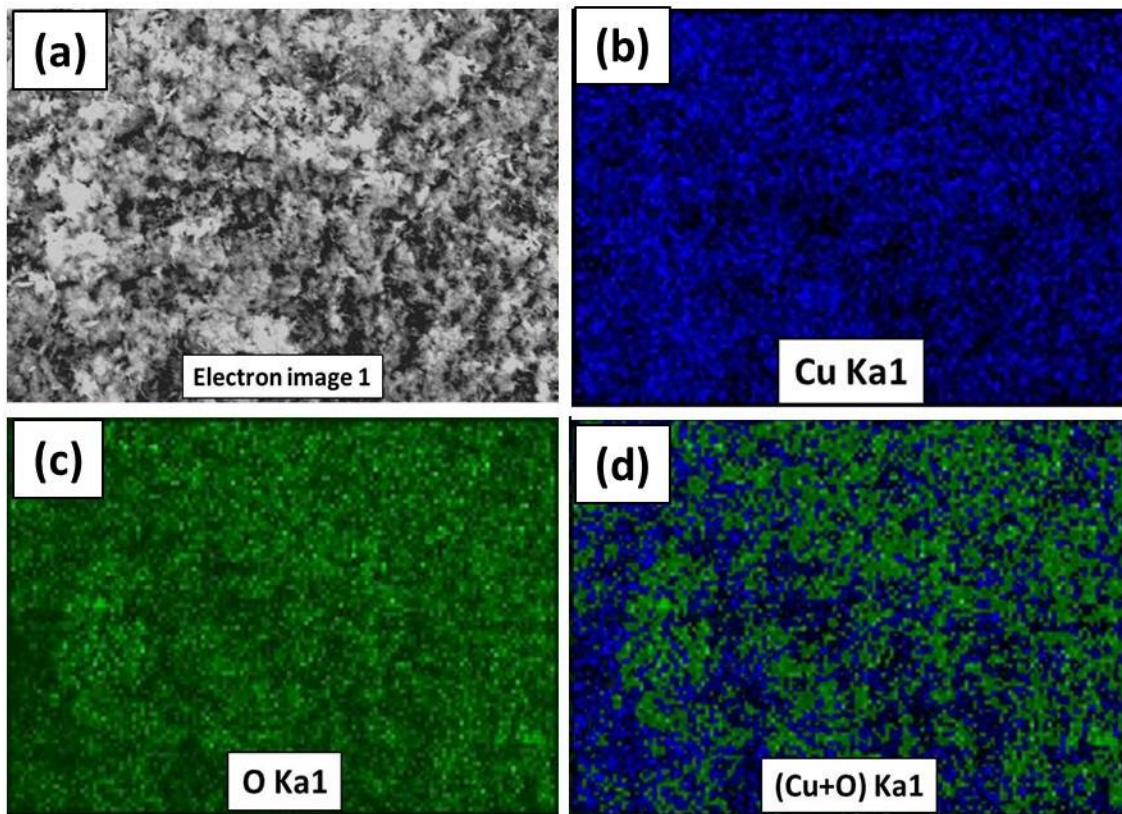

**Figure S3:** Electron image (a) and corresponding EDS elemental maps of O, Cu, and (Cu+O) (b-d), respectively of the as synthesized CuO sample S-1.

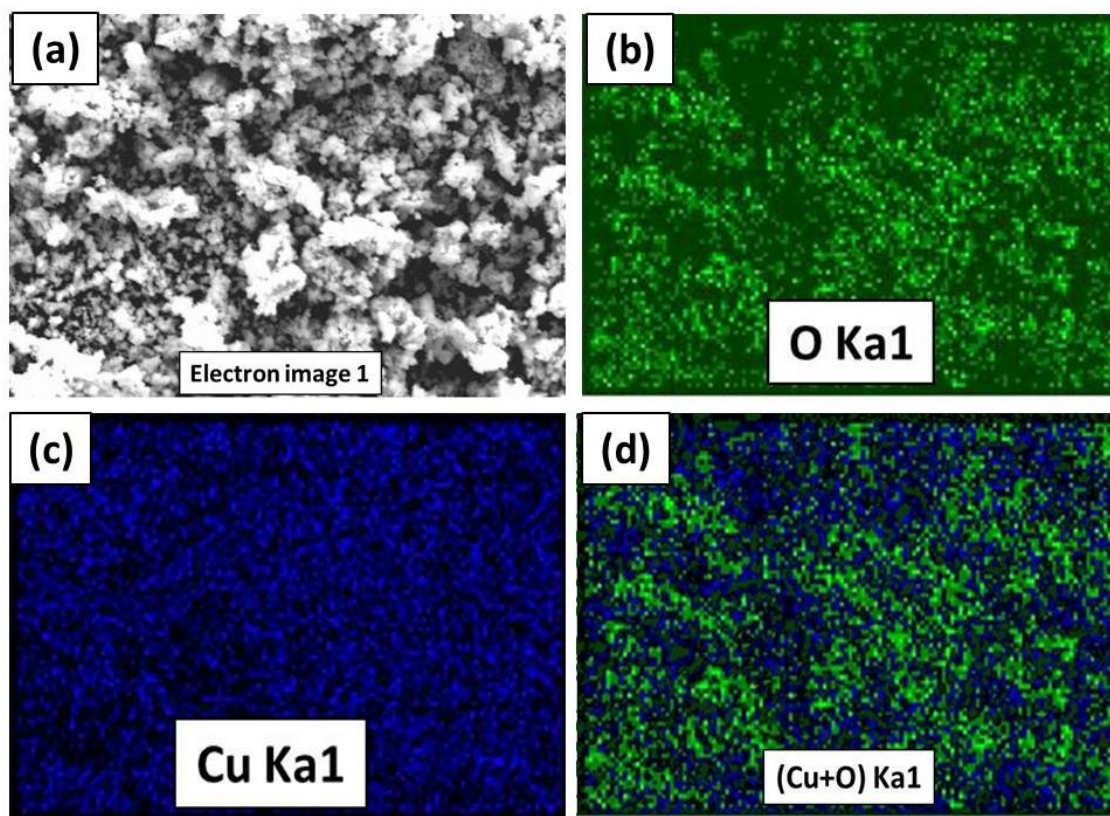

**Figure S4:** N<sub>2</sub> adsorption/desorption isotherm and pore size distribution curve of S-0.1 (a, b) and S-1 (c, d) CuO nanostructure, respectively.

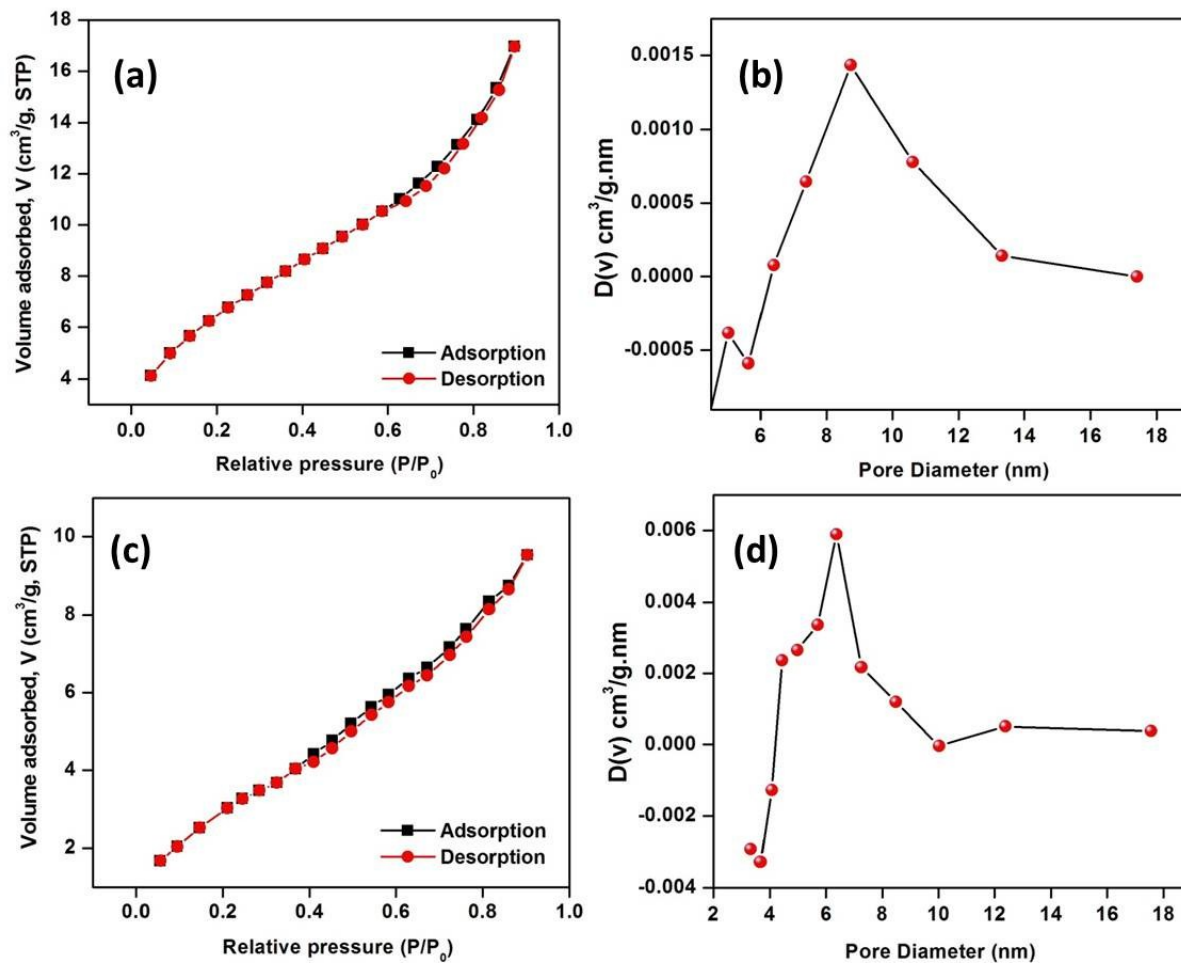

**Figure S5:** Time dependent UV-visible absorption spectra of reaction solutions of MB with only S-1 CuO (a), S-0.1 CuO (b), H<sub>2</sub>O<sub>2</sub> (c), and MO with only S-1 CuO (d), S-0.1 CuO (e), and H<sub>2</sub>O<sub>2</sub> (f), respectively. Conditions: [dye] = 5 mg/L, amount of dye solution = 10 mL, H<sub>2</sub>O<sub>2</sub> = 1 mL, amount of catalyst = 3 mg and reaction temperature = 65 °C.

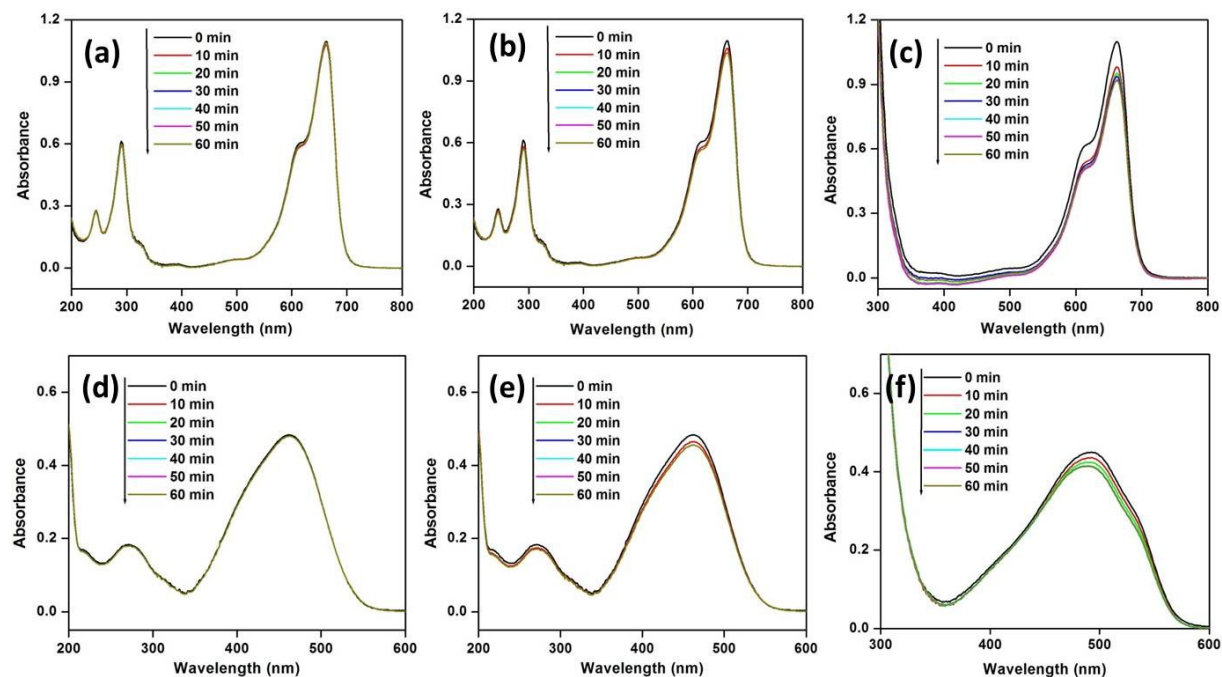

**Figure S6:** PL spectra of terephthalic acid solution in the presence of CuO nanostructures. The excitation wavelength is 325 nm. The PL is attributed to the production of  $\bullet\text{OH}$  and subsequent 2-hydroxyterephthalic acid.

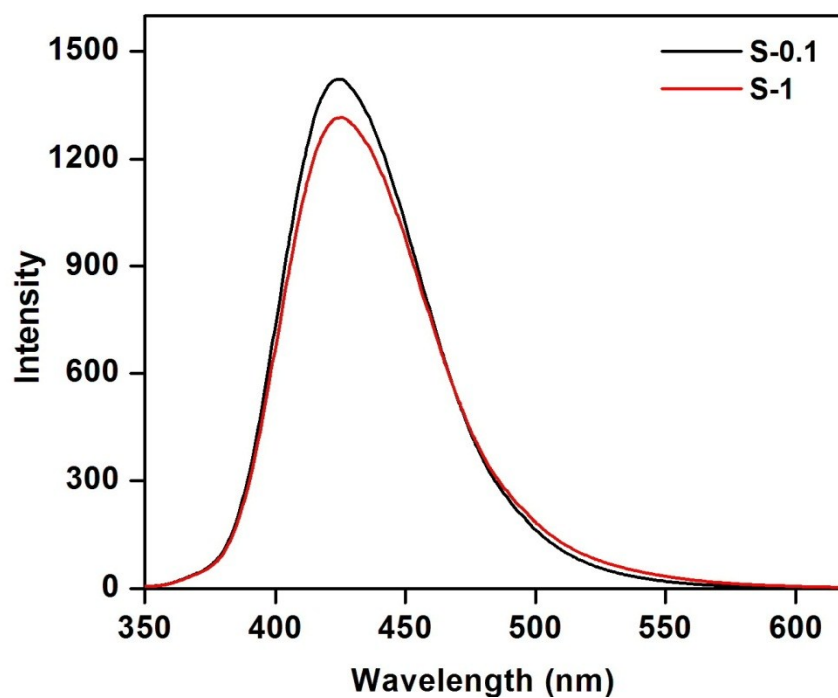



**Figure S7:** EDS of S-0.1 CuO (a, b) and S-1 CuO (c, d) after catalytic degradation of MB and MO, respectively; FTIR spectra of the CuO nanostructures after treating MB and MO (e).

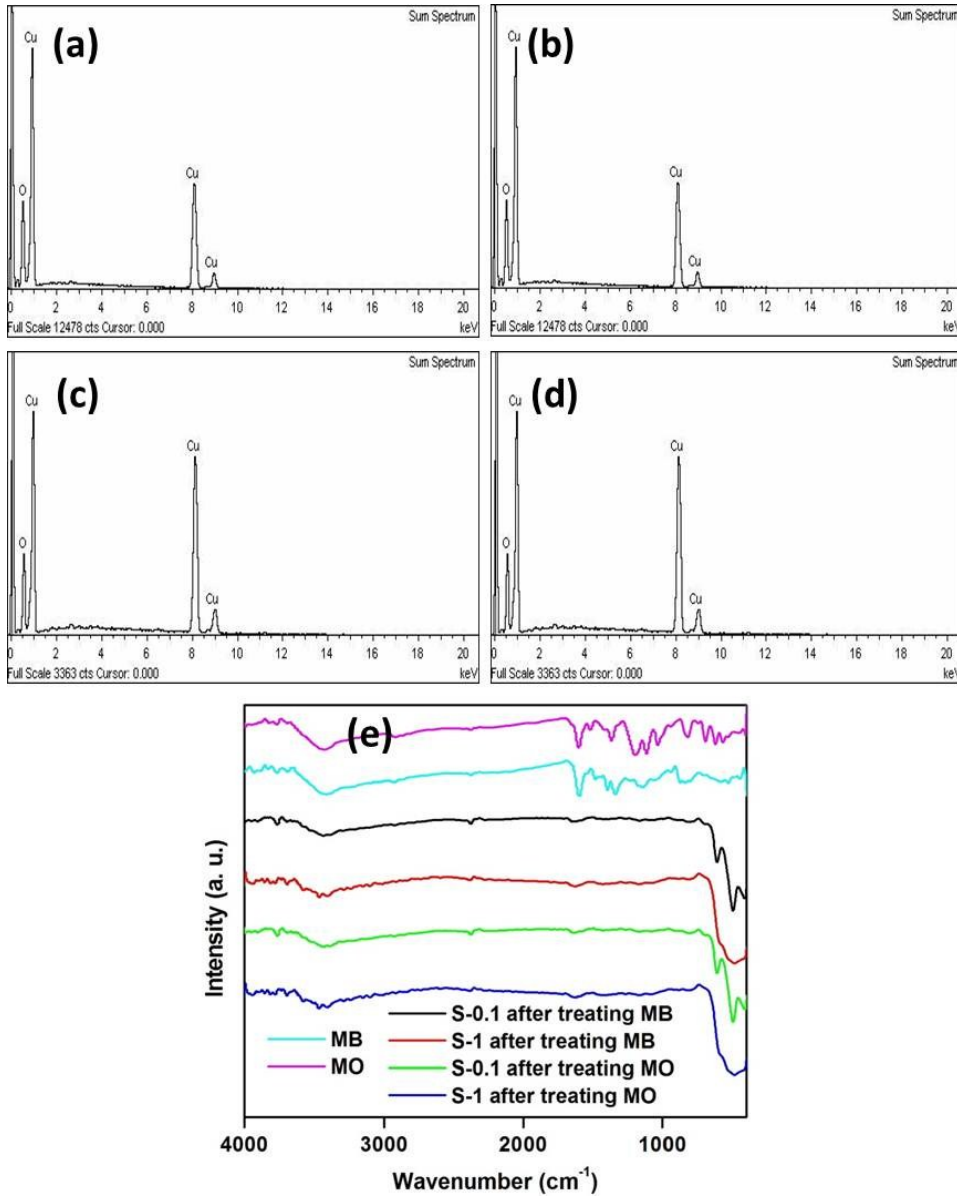



**Figure S8:** Time dependent UV-visible absorption spectra of reaction solutions of MB with S-0.1 CuO (a), S-1 CuO (b) at 25 °C and S-0.1 CuO (c), S-1 CuO (d) at 35 °C, respectively. Conditions: [dye] = 5 mg/L, volume of dye solution = 10 mL, H<sub>2</sub>O<sub>2</sub> = 1 mL and amount of catalyst = 3 mg.

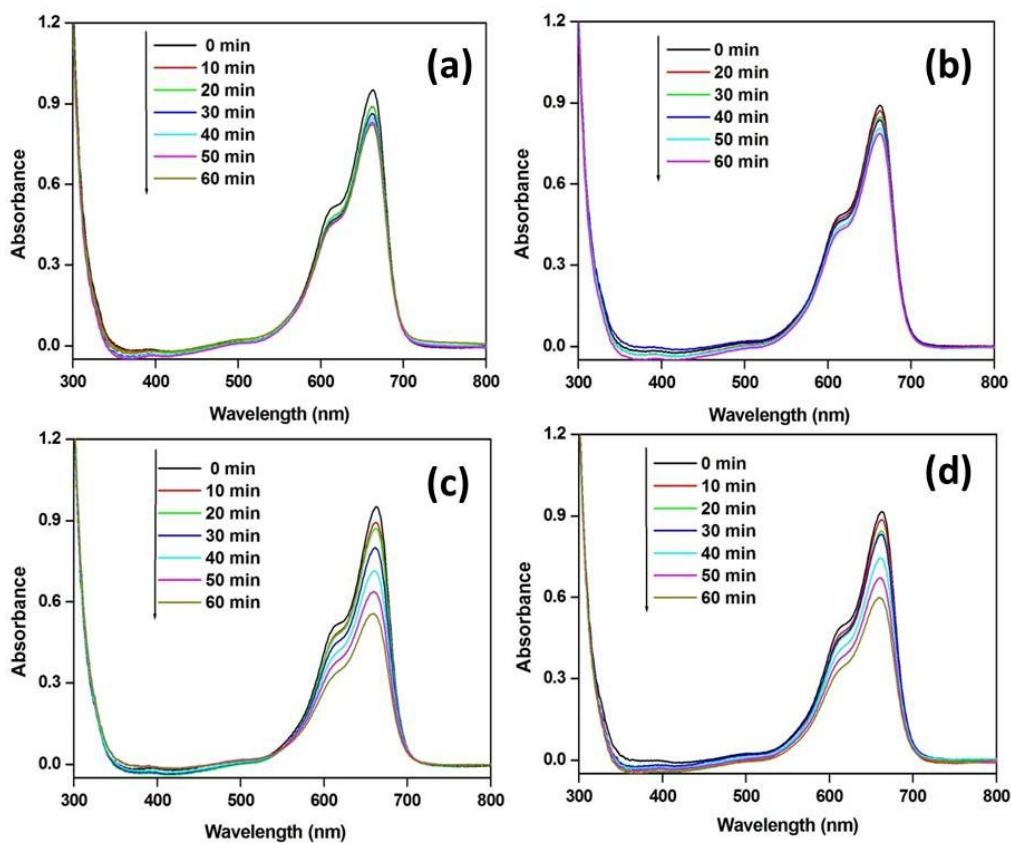

**Figure S9:** Time dependent UV-visible absorption spectra of reaction solutions of MO with S-0.1 CuO (a), S-1 CuO (b) at 25 °C and S-0.1 CuO (c), S-1 CuO (d) at 35 °C, respectively. Conditions: [dye] = 5 mg/L, volume of dye solution = 10 mL, H<sub>2</sub>O<sub>2</sub> = 1 mL and amount of catalyst = 3 mg.

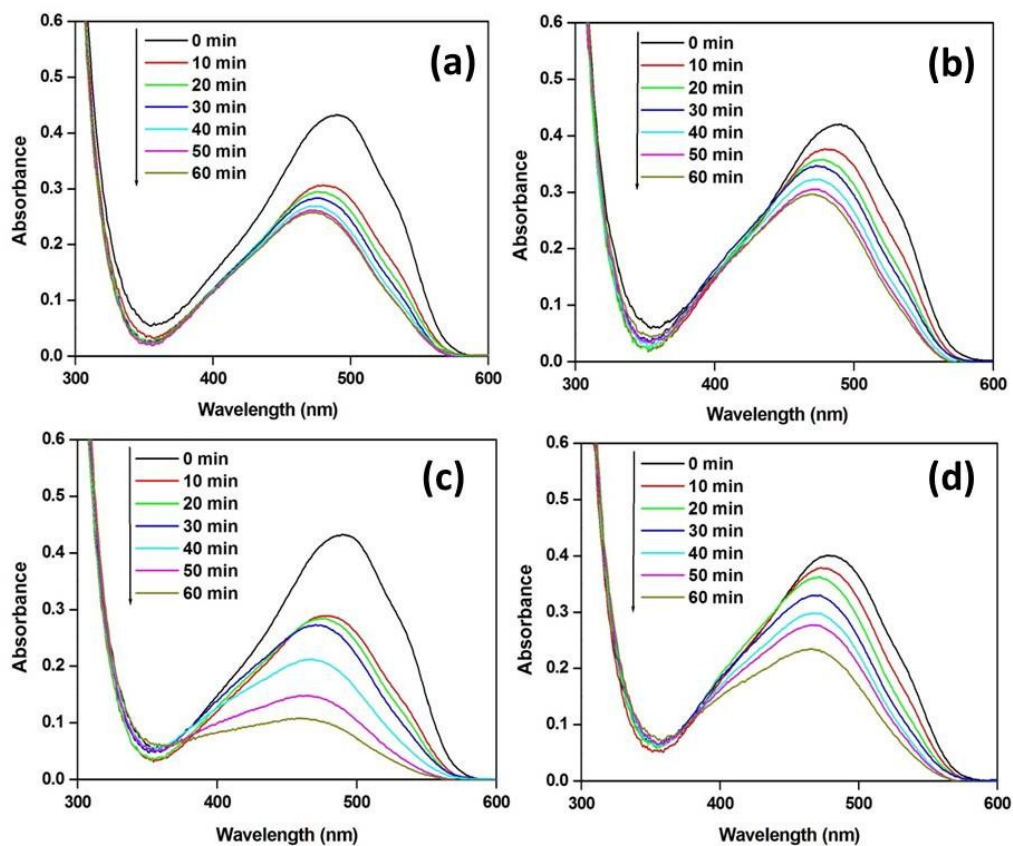

**Figure S10:** Time dependent UV-visible absorption spectra of reaction solutions of MB over S-0.1 CuO with catalyst dosage of 1 mg (a) and 6 mg (b) and S-1 CuO with catalyst dosage of 1 mg (c) and 6 mg (d), respectively. Conditions: [MB] = 5 mg/L, volume of MB solution = 10 mL, H<sub>2</sub>O<sub>2</sub> = 1 mL and reaction temperature = 65 °C.

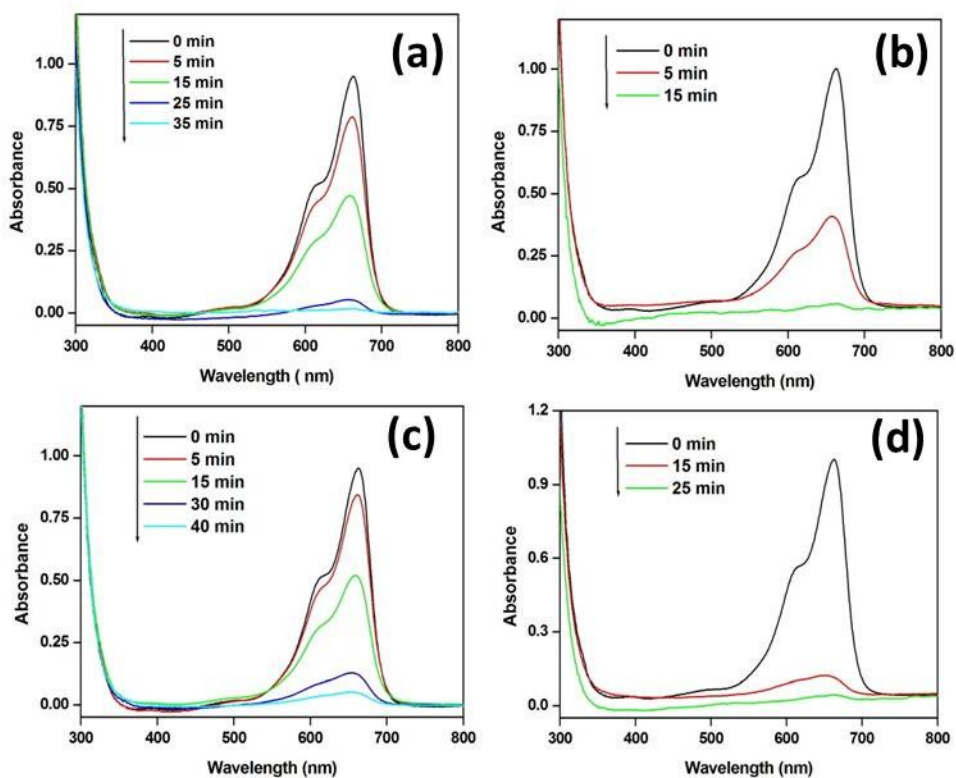

**Figure S11:** Time dependent UV-visible absorption spectra of reaction solutions of MO over S-0.1 CuO with catalyst dosage of 1 mg (a) and 6 mg (b) and S-1 CuO with catalyst dosage of 1 mg (c) and 6 mg (d), respectively. Conditions: [MO] = 5 mg/L, volume of MO solution = 10 mL, H<sub>2</sub>O<sub>2</sub> = 1 mL and reaction temperature = 65 °C.

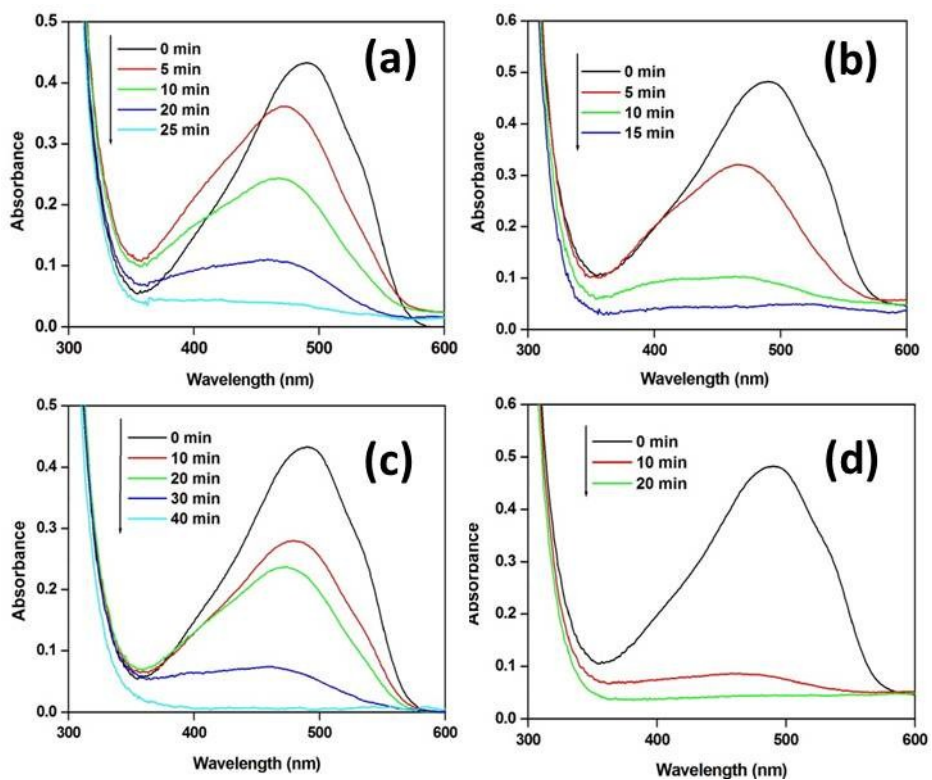

**Figure S12:** Time dependent UV-visible absorption spectra of degradation of MB over S-0.1 CuO for catalytic cycle 2 (a), cycle 3 (b), cycle 4 (c), and cycle 5 (d), respectively. Conditions: [MB] = 5 mg/L, volume of MB solution = 10 mL, H<sub>2</sub>O<sub>2</sub> = 1 mL, amount of catalyst = 6 mg and reaction temperature = 65 °C.

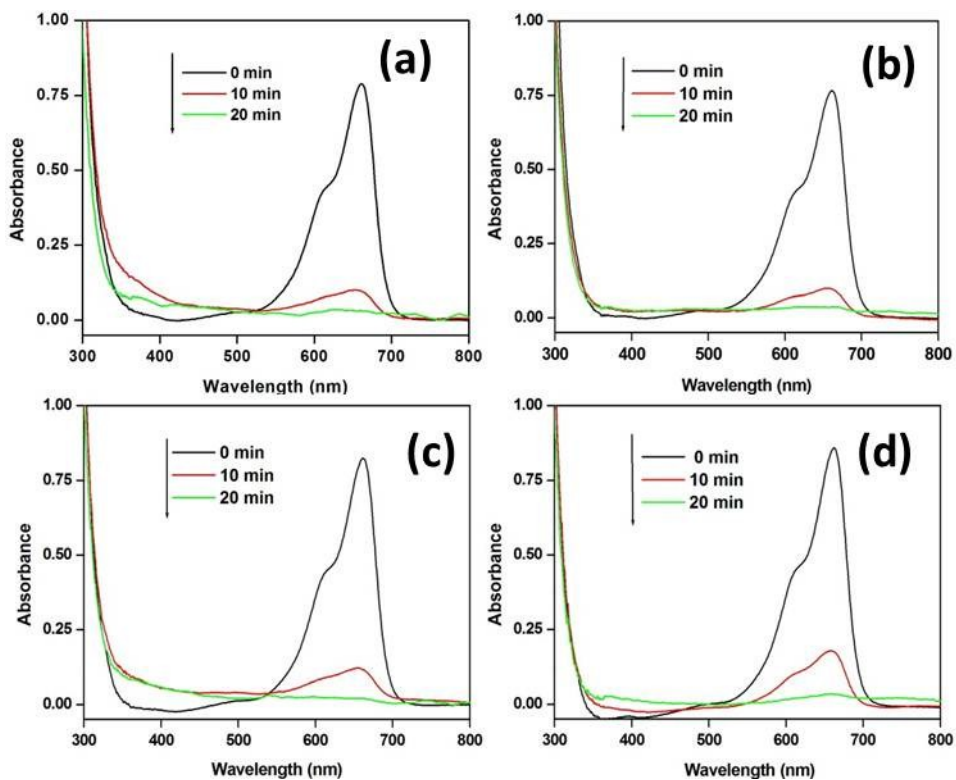

**Figure S13:** Time dependent UV-visible absorption spectra of degradation of MO over S-0.1 CuO for catalytic cycle 2 (a), cycle 3 (b), cycle 4 (c), and cycle 5 (d), respectively. Conditions: [MO] = 5 mg/L, volume of MO solution = 10 mL, H<sub>2</sub>O<sub>2</sub> = 1 mL, amount of catalyst = 6 mg and reaction temperature = 65 °C.

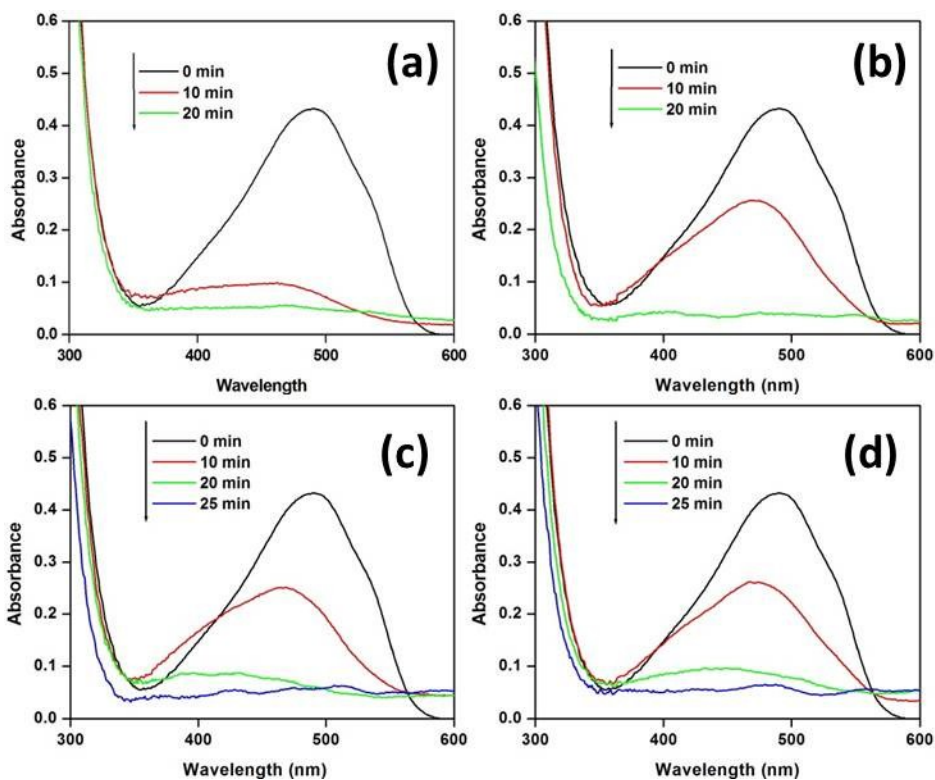

**Figure S14:** FTIR spectra of (a) dye molecules and (b) degradation products.

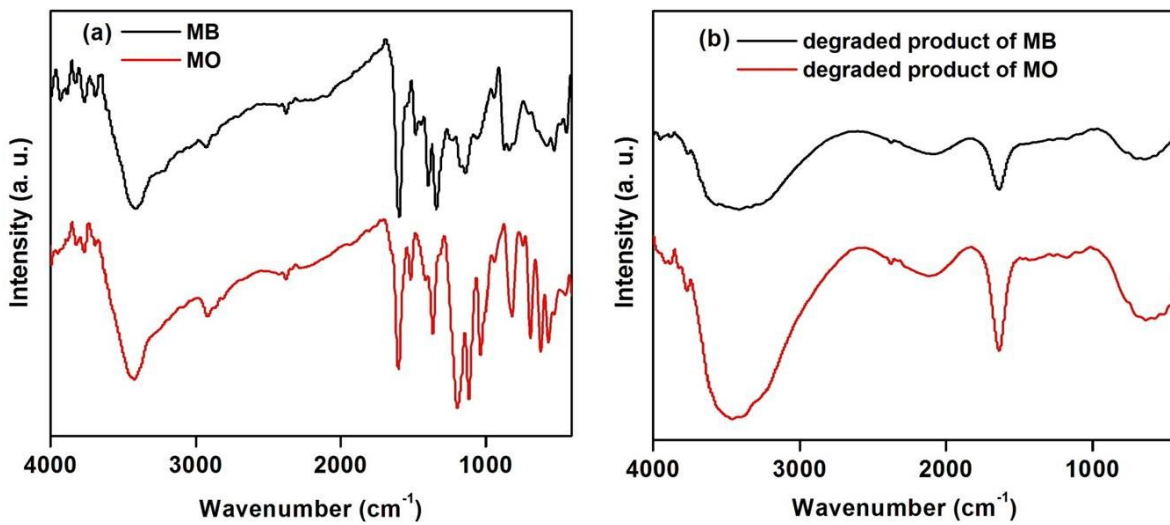

Supplement: c6ra20173c1.pdf [file c6ra20173c1.pdf]
